# Supplementary material for: A topological quantum catalyst: the case of two-dimensional traversing nodal line states associated with high catalytic performance for the hydrogen evolution reaction
Source: Royal Society of Chemistry journal article supplement (doi:10.1039/d1ta06553j), 2021-01-01
Supplement: d1ta06553j1.pdf [file d1ta06553j1.pdf]

*Supporting Information for*

Topological quantum catalyst: the case of two-dimensional  
traversing nodal line states associated with high catalytic  
performance for hydrogen evolution reaction

Lirong Wang,<sup>1,2</sup> Xiaoming Zhang<sup>1,2\*</sup>, Weizhen Meng,<sup>1,2</sup> Ying Liu,<sup>2</sup> Xuefang Dai,<sup>2</sup> and  
Guodong Liu<sup>1,2\*</sup>

<sup>1</sup>State Key Laboratory of Reliability and Intelligence of Electrical Equipment, Hebei University of  
Technology, Tianjin 300130, China

<sup>2</sup>School of Materials Science and Engineering, Hebei University of Technology, Tianjin 300130, China  
Correspondence: [zhangxiaoming87@hebut.edu.cn](mailto:zhangxiaoming87@hebut.edu.cn); [gdlu1978@126.com](mailto:gdlu1978@126.com)

## I. Adsorption model

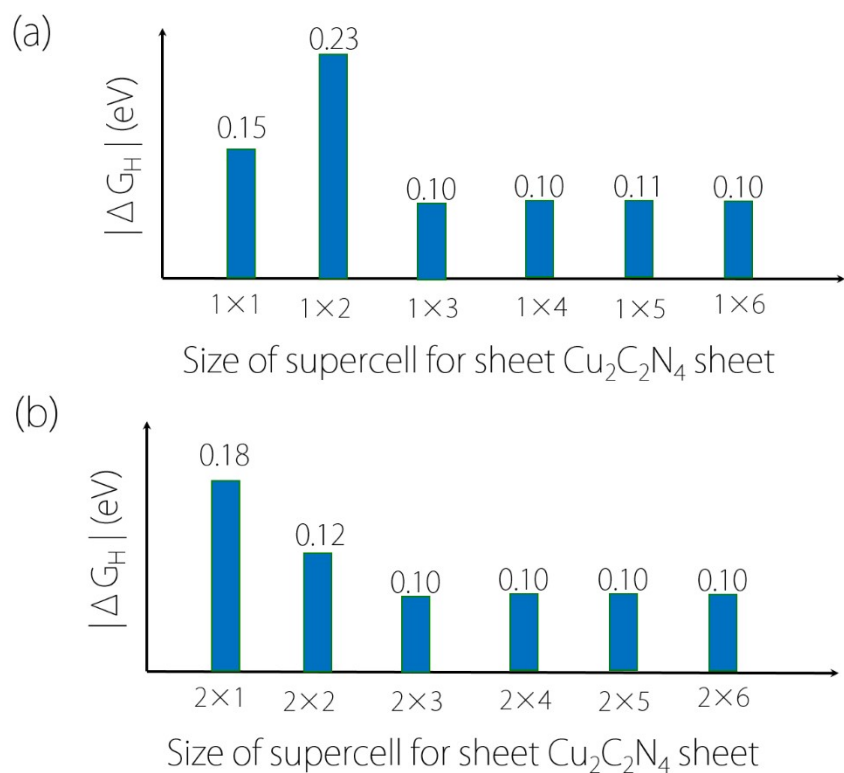

**FigS1** Comparison of  $|\Delta G_{H^*}|$  for  $\text{Cu}_2\text{C}_2\text{N}_4$  sheet under different sizes of supercell.

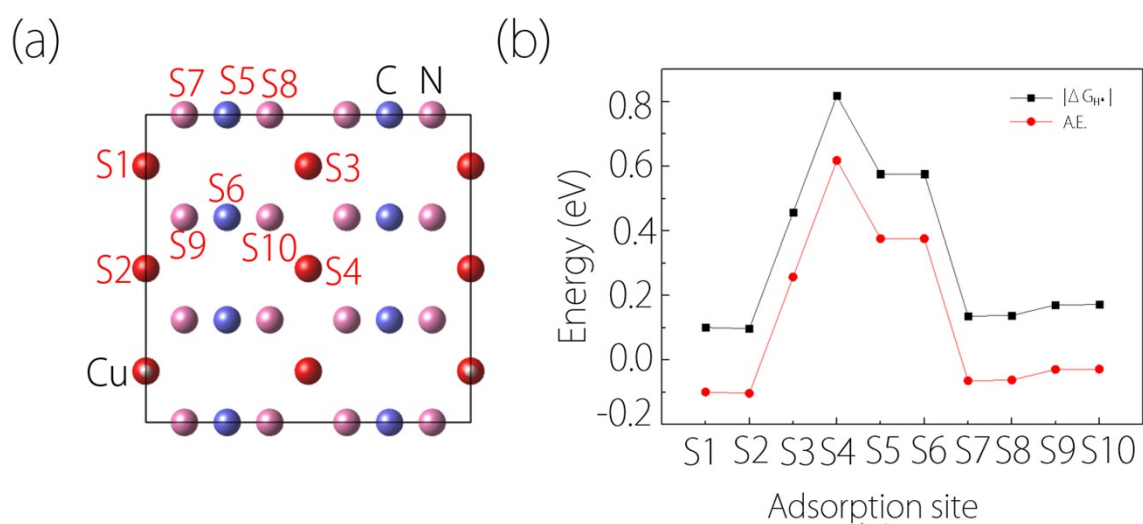

**FigS2** (a) The selected adsorption sites (denoted as S1-S10) in the  $1 \times 3$  supercell of  $\text{Cu}_2\text{C}_2\text{N}_4$  sheet. (b) comparison of  $|\Delta G_{H^*}|$  and adsorption energy (A.E.) among different adsorption sites.

## II. Electronic structure and $\Delta G_{H^*}$ in 2D TiZn

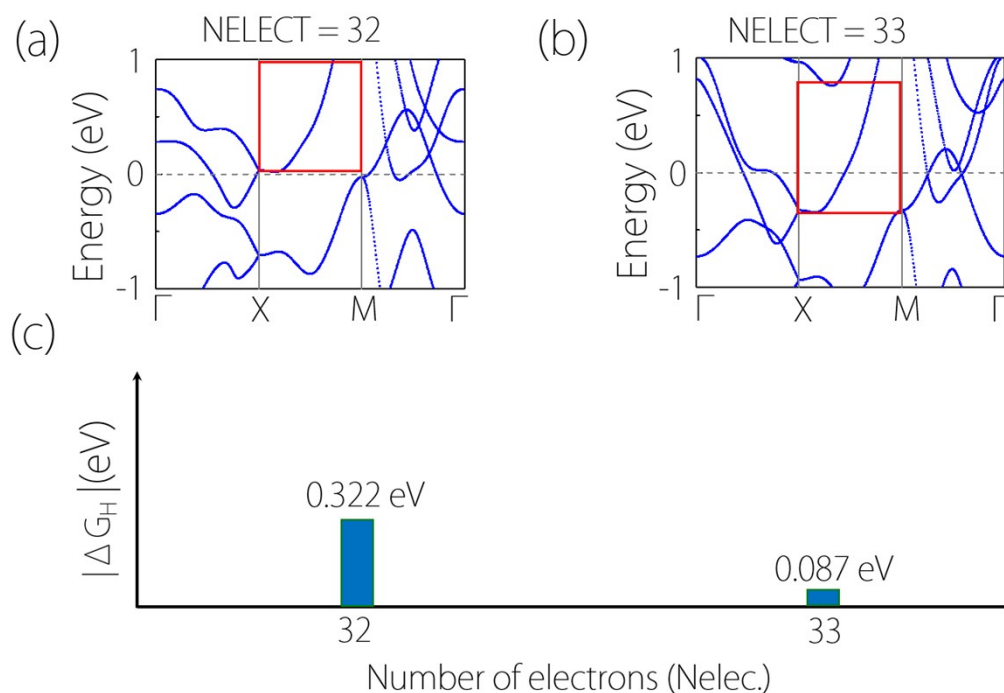

**FigS3** Electronic band structure for TiZn (a) without and (b) with one electron doping. The framed region in the band structure shows the position of open nodal line. (c) Comparison of  $|\Delta G_{H^*}|$  for TiZn without (Nelec.= 32) and with electron doping (Nelec.= 33).

## III. Exfoliation feasibility of $\text{Cu}_2\text{C}_2\text{N}_4$ sheet

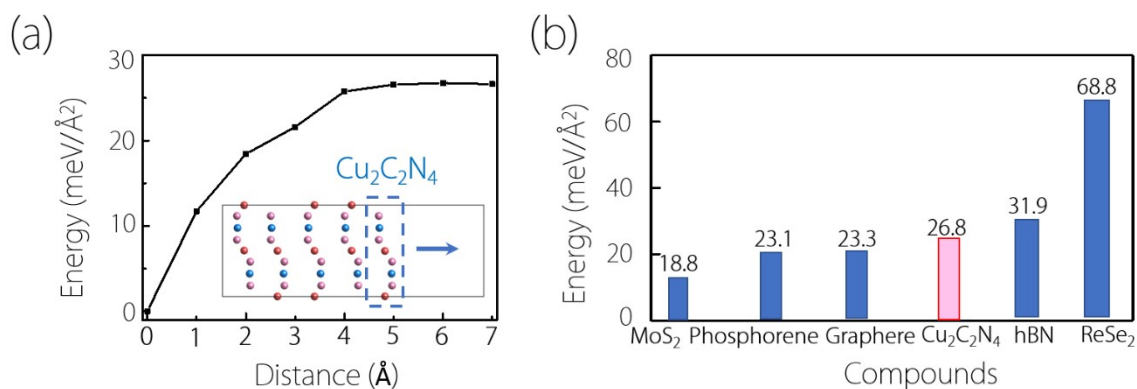

**FigS4** (a) The model and results for exfoliation energy calculation of  $\text{Cu}_2\text{C}_2\text{N}_4$  sheet. (b) Comparison of exfoliation energy in  $\text{Cu}_2\text{C}_2\text{N}_4$  sheet and other typical monolayers. Some data in (b) are taken from references [*Nano Lett.* 18, 5, 2759–2765 (2018); *ACS Appl. Mater. Interfaces* 8, 5385–5392 (2016)].

#### IV. Defect model and band structure

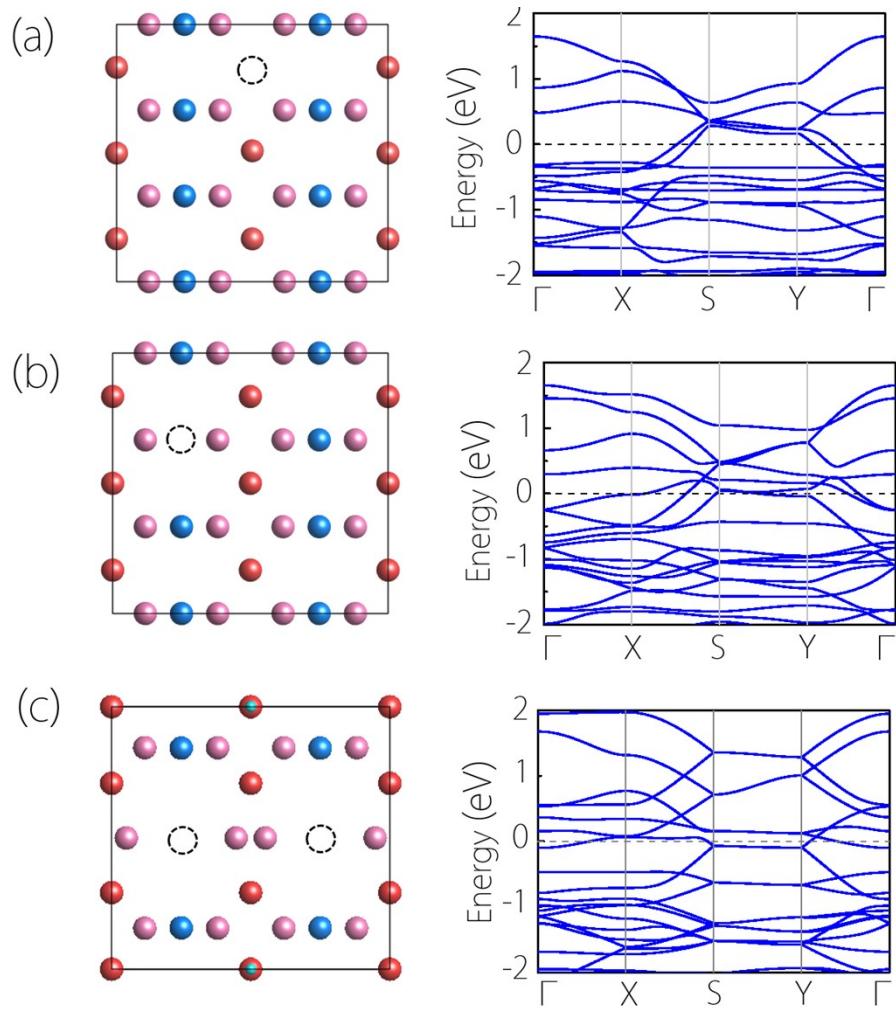

**FigS5** (a) Crystal structure and electronic band structure of  $\text{Cu}_2\text{C}_2\text{N}_4$  sheet with one Cu defect. (b) and (c) are similar with (a) but for the cases with one C defect and two C defects. In (a) and (b), the  $S_{2y}$  symmetry is broken, and the nodal lines do not occur. In (c), the  $S_{2y}$  symmetry and the nodal line in the S-Y path is preserved.

#### IV. Band structure and $\Delta G_{H^*}$ for Cu<sub>2</sub>Si and CuSe

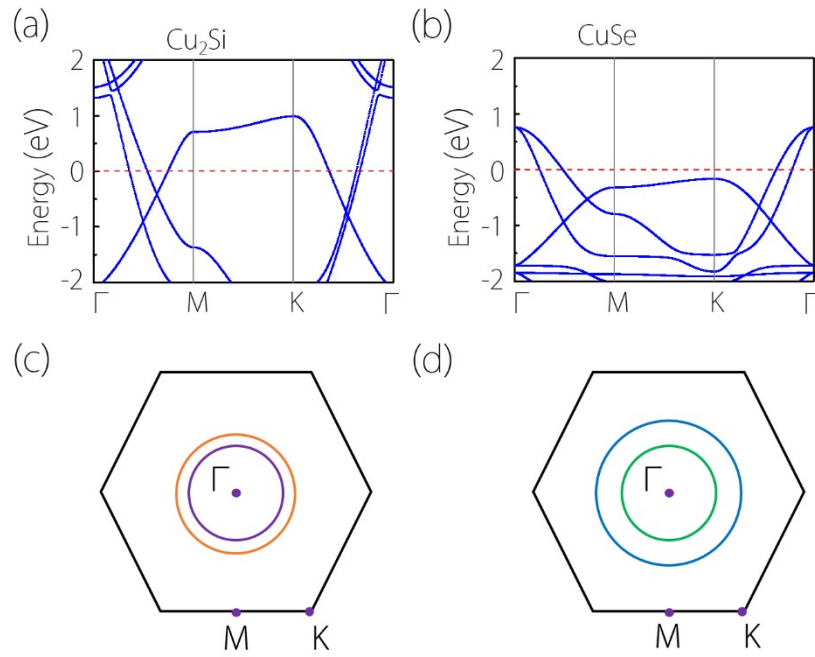

**FigS6** (a) Electronic band structure of Cu<sub>2</sub>Si monolayer. (b) Electronic band structure of CuSe monolayer. (c) Illustration of two closed nodal lines in Cu<sub>2</sub>Si monolayer. (d) Illustration of two closed nodal lines in CuSe monolayer.

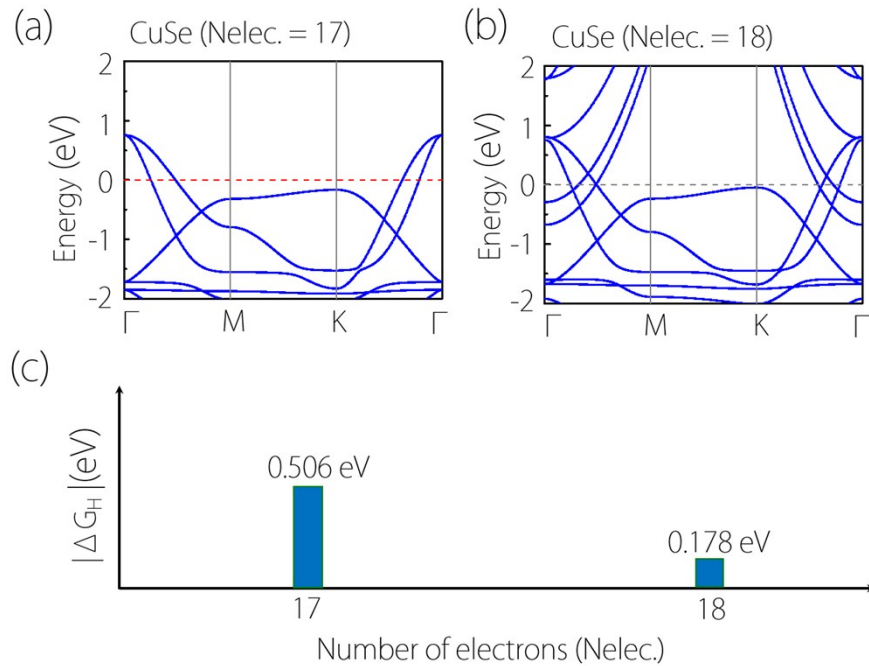

**FigS7** Electronic band structure of CuSe (a) without and (b) with one electron doping. (c) Comparison of  $\Delta G_{H^*}$  of CuSe before and after electron doping.
